# Supplementary material for: Using average nucleotide identity to improve taxonomic assignments in prokaryotic genomes at the NCBI
Source: PubMed Central journal article supplement (PMC6978984; doi:10.1099/ijsem.0.002809), 2018-05-24
Supplement: ijsem-68-2386-s001.pdf [file ijsem-68-2386-s001.pdf]

| scientific_name                | species_taxid | count_concordant | ani_concordant | count_discordant | ani_discordant | ani_diff    |
|--------------------------------|---------------|------------------|----------------|------------------|----------------|-------------|
| Borrelia burgdorferi           | 139           | 98               | 98.90816542    | 46               | 91.06390144    | 7.844263981 |
| Brachyspira hyodysenteriae     | 159           | 26               | 99.13750804    | 16               | 87.19409736    | 11.94341068 |
| Leptospira interrogans         | 173           | 278              | 99.29517665    | 163              | 84.99151384    | 14.3036628  |
| Leptospira borgpetersenii      | 174           | 35               | 99.15387857    | 406              | 84.03191096    | 15.12196761 |
| Azospirillum brasilense        | 192           | 10               | 97.43933996    | 10               | 83.97283936    | 13.4665006  |
| Campylobacter coli             | 195           | 810              | 97.63563698    | 1209             | 85.56741231    | 12.06822466 |
| Campylobacter fetus            | 196           | 64               | 93.32570994    | 22               | 82.69987476    | 10.62583517 |
| Campylobacter jejuni           | 197           | 1160             | 97.22506746    | 881              | 85.49048804    | 11.73457942 |
| Campylobacter hyointestinalis  | 198           | 19               | 98.35215491    | 67               | 86.054786      | 12.29736891 |
| Campylobacter lari             | 201           | 10               | 94.87756348    | 1409             | 80.97513149    | 13.90243198 |
| Helicobacter pylori            | 210           | 857              | 94.67585887    | 12               | 86.78959052    | 7.886268349 |
| Helicobacter felis             | 214           | 21               | 97.16886902    | 17               | 83.06363992    | 14.1052291  |
| Brucella abortus               | 235           | 183              | 99.92975236    | 365              | 97.4508235     | 2.478928856 |
| Brucella ovis                  | 236           | 15               | 99.98727671    | 532              | 98.0677314     | 1.919545315 |
| Elizabethkingia meningoseptica | 238           | 21               | 99.05593243    | 89               | 82.88523998    | 16.17069245 |
| Francisella tularensis         | 263           | 227              | 98.53462342    | 30               | 84.80945347    | 13.72516995 |
| Comamonas testasteroni         | 285           | 26               | 94.33528534    | 78               | 84.13075022    | 10.20453512 |
| Pseudomonas aeruginosa         | 287           | 2627             | 99.21002183    | 1017             | 83.78916586    | 15.42085597 |
| Burkholderia cepacia           | 292           | 97               | 97.07458191    | 1919             | 87.62910168    | 9.445480236 |
| Pseudomonas fluorescens        | 294           | 117              | 86.71377723    | 3860             | 82.70291638    | 4.010860851 |
| Pseudomonas fragi              | 296           | 20               | 93.53100345    | 1190             | 83.19371126    | 10.33729219 |
| Pseudomonas putida             | 303           | 85               | 89.42169908    | 3062             | 82.53160613    | 6.89009294  |
| Ralstonia solanacearum         | 305           | 77               | 95.0166946     | 70               | 84.31648058    | 10.70021402 |
| Pseudomonas stutzeri           | 316           | 47               | 89.86598871    | 2579             | 82.61552558    | 7.250463129 |
| Pseudomonas syringae           | 317           | 279              | 90.66846934    | 348              | 86.09038263    | 4.57808671  |
| Ralstonia pickettii            | 329           | 12               | 94.37283603    | 110              | 85.59922489    | 8.773611138 |
| Xanthomonas campestris         | 339           | 67               | 91.01320203    | 983              | 86.88792624    | 4.12527579  |
| Xanthomonas translucens        | 343           | 45               | 96.92693498    | 1049             | 83.68248133    | 13.24445365 |
| Xanthomonas citri              | 346           | 103              | 98.24404801    | 908              | 88.36647689    | 9.877571119 |
| Xanthomonas oryzae             | 347           | 153              | 99.33454312    | 747              | 87.24899708    | 12.08554604 |
| Agrobacterium tumefaciens      | 358           | 33               | 91.59790595    | 81               | 87.70588668    | 3.892019278 |
| Bradyrhizobium japonicum       | 375           | 23               | 94.62413666    | 162              | 86.21770037    | 8.406436295 |
| Sinorhizobium fredii           | 380           | 14               | 96.66170829    | 284              | 83.23642873    | 13.42527956 |
| Rhizobium leguminosarum        | 384           | 43               | 93.34127789    | 236              | 84.8578678     | 8.483410092 |
| Acetobacter pasteurianus       | 438           | 22               | 94.43856448    | 25               | 84.5046069     | 9.939357579 |
| Gluconobacter oxydans          | 442           | 13               | 91.34567848    | 25               | 82.54647705    | 8.799201425 |
| Acinetobacter baumannii        | 470           | 2484             | 97.92873927    | 416              | 87.15091818    | 10.7778211  |
| Acinetobacter calcoaceticus    | 471           | 16               | 94.78274265    | 2866             | 86.99183929    | 7.790903369 |
| Neisseria gonorrhoeae          | 485           | 441              | 99.45768042    | 1479             | 94.3268164     | 5.130864022 |
| Neisseria lactamica            | 486           | 11               | 93.65658951    | 1909             | 93.02617855    | 0.630410963 |
| Neisseria meningitidis         | 487           | 1367             | 97.4094772     | 553              | 93.67654084    | 3.732936363 |
| Bordetella bronchiseptica      | 518           | 70               | 98.90853795    | 824              | 95.17953505    | 3.729002895 |
| Bordetella pertussis           | 520           | 627              | 99.8676106     | 266              | 88.40585577    | 11.46175483 |
| Chromobacterium violaceum      | 536           | 16               | 97.26221752    | 45               | 85.66414235    | 11.59807517 |
| Eikenella corrodens            | 539           | 11               | 97.2084137     | 29               | 89.44843384    | 7.759979853 |
| Citrobacter koseri             | 545           | 12               | 99.07762718    | 24717            | 83.96903229    | 15.10859489 |
| Citrobacter freundii           | 546           | 101              | 97.70780357    | 19276            | 83.3037263     | 14.40407728 |
| Klebsiella aerogenes           | 548           | 135              | 98.44498229    | 4258             | 86.0678885     | 12.37709379 |
| Pantoea agglomerans            | 549           | 21               | 97.02606092    | 175              | 83.0338858     | 13.99267234 |
| Enterobacter cloacae           | 550           | 572              | 88.74315146    | 19858            | 83.09237392    | 5.65077754  |
| Erwinia amylovora              | 552           | 34               | 99.88409008    | 34               | 83.41113019    | 16.47295989 |
| Pantoea ananatis               | 553           | 39               | 97.76255688    | 119              | 82.180724      | 15.58183288 |
| Pectobacterium carotovorum     | 554           | 66               | 93.98625364    | 78               | 84.66435227    | 9.321901368 |
| Escherichia coli               | 562           | 10022            | 97.69048085    | 13864            | 84.83541672    | 12.85506413 |
| Hafnia alvei                   | 569           | 10               | 93.7203804     | 10               | 87.63568268    | 6.084697723 |
| Klebsiella oxytoca             | 571           | 106              | 95.51431598    | 15029            | 83.22829553    | 12.28602045 |
| Klebsiella pneumoniae          | 573           | 3515             | 99.07311748    | 21186            | 83.49987665    | 15.57324084 |
| Raoultella planticola          | 575           | 11               | 99.43074452    | 5312             | 84.28038935    | 15.15035516 |
| Proteus mirabilis              | 584           | 70               | 98.81720472    | 14               | 85.00992966    | 13.80727506 |
| Providencia stuartii           | 588           | 13               | 98.21937854    | 26               | 82.59956154    | 15.619817   |
| Serratia marcescens            | 615           | 349              | 95.78906058    | 205              | 85.62929989    | 10.15976069 |
| Shigella boydii                | 621           | 51               | 98.98327884    | 19201            | 92.01911873    | 6.964160104 |
| Shigella flexneri              | 623           | 82               | 99.82786095    | 19154            | 91.89022583    | 7.937635117 |
| Shigella sonnei                | 624           | 999              | 99.81459494    | 18238            | 91.64585022    | 8.168744723 |
| Yersinia enterocolitica        | 630           | 174              | 97.30331033    | 526              | 84.93525871    | 12.36805162 |
| Yersinia intermedia            | 631           | 19               | 96.73331612    | 680              | 84.89901653    | 11.83429959 |
| Yersinia pestis                | 632           | 300              | 99.95642749    | 399              | 86.4855065     | 13.47092098 |
| Yersinia pseudotuberculosis    | 633           | 49               | 99.10985861    | 650              | 91.36311194    | 7.746746674 |
| Edwardsiella tarda             | 636           | 12               | 95.04231366    | 17               | 84.69096823    | 10.35134543 |
| Aeromonas hydrophila           | 644           | 62               | 96.14907641    | 174              | 87.86865815    | 8.280418263 |
| Aeromonas salmonicida          | 645           | 41               | 98.62918725    | 195              | 86.67925681    | 11.94993044 |
| Aeromonas caviae               | 648           | 12               | 98.00749553    | 224              | 87.27437736    | 10.73311817 |
| Aeromonas veronii              | 654           | 41               | 96.38899657    | 195              | 87.31860183    | 9.070394736 |
| Photobacterium angustum        | 661           | 13               | 97.56047704    | 37               | 83.62100323    | 13.93947381 |
| Vibrio alginolyticus           | 663           | 36               | 97.62298518    | 1107             | 84.60919583    | 13.01378935 |
| Vibrio cholerae                | 666           | 702              | 99.04349982    | 81               | 84.02715989    | 15.01633993 |
| Vibrio harveyi                 | 669           | 35               | 96.98679071    | 1268             | 83.55148813    | 13.43530258 |
| Vibrio parahaemolyticus        | 670           | 797              | 98.4870231     | 346              | 83.29169009    | 15.19533302 |

|                                       |      |      |             |      |             |              |
|---------------------------------------|------|------|-------------|------|-------------|--------------|
| Vibrio vulnificus                     | 672  | 116  | 97.61350073 | 988  | 82.58982766 | 15.02367307  |
| Vibrio fluvialis                      | 676  | 10   | 98.19464535 | 799  | 81.01746627 | 17.17717908  |
| Vibrio campbellii                     | 680  | 27   | 96.8101849  | 1218 | 83.6248468  | 13.1853381   |
| Aggregatibacter actinomycetemcomitans | 714  | 37   | 97.71753074 | 11   | 83.2634312  | 14.45409954  |
| Haemophilus haemolyticus              | 726  | 10   | 95.79578781 | 478  | 90.64877107 | 5.147016741  |
| Haemophilus influenzae                | 727  | 404  | 97.26700872 | 82   | 86.53154066 | 10.73546805  |
| Haemophilus parainfluenzae            | 729  | 24   | 94.88883624 | 473  | 84.74265337 | 10.14618287  |
| Gallibacterium anatis                 | 750  | 26   | 97.43505463 | 10   | 85.97076721 | 11.46428741  |
| Bartonella bacilliformis              | 774  | 16   | 99.22146174 | 93   | 81.48912856 | 17.73233318  |
| Ehrlichia ruminantium                 | 779  | 10   | 96.44986513 | 13   | 81.95751014 | 14.49235499  |
| Rickettsia prowazekii                 | 782  | 11   | 99.94196042 | 107  | 88.37643461 | 11.56552581  |
| Bartonella quintana                   | 803  | 12   | 99.90409342 | 98   | 84.10671219 | 15.79738124  |
| Chlamydia trachomatis                 | 813  | 144  | 99.36392154 | 58   | 80.9485104  | 18.41541114  |
| Bacteroides thetaiotaomicron          | 818  | 14   | 97.979599   | 59   | 85.13001665 | 12.84958235  |
| Bacteroides uniformis                 | 820  | 18   | 98.51357112 | 24   | 85.93709326 | 12.57647786  |
| Bacteroides vulgatus                  | 821  | 13   | 99.33850685 | 16   | 93.97356272 | 5.364944128  |
| Porphyromonas gingivalis              | 837  | 59   | 98.59584679 | 13   | 92.53852081 | 6.057325977  |
| Fusobacterium nucleatum               | 851  | 57   | 93.10029645 | 35   | 89.89310147 | 3.20719498   |
| Fusobacterium periodonticum           | 860  | 15   | 92.7247167  | 75   | 87.47761505 | 5.247101644  |
| Leuconostoc gelidium                  | 1244 | 11   | 96.66191826 | 22   | 81.51504257 | 15.14687569  |
| Leuconostoc mesenteroides             | 1245 | 52   | 97.87525363 | 28   | 84.76854189 | 13.10671174  |
| Pediococcus acidilactici              | 1254 | 22   | 98.20329842 | 14   | 81.14441554 | 17.05888288  |
| Pediococcus pentosaceus               | 1255 | 12   | 99.14387258 | 22   | 81.40235623 | 17.74151634  |
| Micrococcus luteus                    | 1270 | 24   | 97.6735843  | 16   | 91.29054308 | 6.383041223  |
| Staphylococcus aureus                 | 1280 | 8649 | 98.82383125 | 253  | 87.96140449 | 10.86242675  |
| Staphylococcus epidermidis            | 1282 | 481  | 99.3142257  | 586  | 83.54344637 | 15.77077933  |
| Staphylococcus haemolyticus           | 1283 | 168  | 99.16696167 | 901  | 83.6102908  | 15.55667087  |
| Staphylococcus xylosum                | 1288 | 18   | 96.69086499 | 109  | 82.94193457 | 13.74893042  |
| Staphylococcus hominis                | 1290 | 49   | 98.37480693 | 889  | 83.77760435 | 14.59720258  |
| Staphylococcus sciuri                 | 1296 | 17   | 98.24975496 | 14   | 87.38739341 | 10.86236156  |
| Streptococcus gordonii                | 1302 | 25   | 95.51467752 | 142  | 87.53564282 | 7.979034704  |
| Streptococcus oralis                  | 1303 | 85   | 93.50228455 | 8310 | 87.27986693 | 6.222417617  |
| Streptococcus salivarius              | 1304 | 44   | 95.64141163 | 79   | 90.74894177 | 4.892469859  |
| Streptococcus sanguinis               | 1305 | 30   | 95.98241911 | 63   | 87.52673951 | 8.455679599  |
| Streptococcus thermophilus            | 1308 | 44   | 99.19395742 | 65   | 89.86115547 | 9.33280195   |
| Streptococcus agalactiae              | 1311 | 909  | 99.14002155 | 29   | 98.4273779  | 0.71264365   |
| Streptococcus pneumoniae              | 1313 | 8090 | 98.67169034 | 277  | 88.59196063 | 10.07972971  |
| Streptococcus pyogenes                | 1314 | 337  | 99.02824378 | 305  | 84.58476358 | 14.44348021  |
| Streptococcus parasanguinis           | 1318 | 26   | 95.05034168 | 1451 | 85.47274575 | 9.577595933  |
| Streptococcus anginosus               | 1328 | 39   | 95.27829281 | 48   | 91.24314938 | 4.035143431  |
| Streptococcus dysgalactiae            | 1334 | 26   | 97.56624695 | 586  | 86.37700273 | 11.18924422  |
| Streptococcus equinus                 | 1335 | 31   | 93.48268738 | 38   | 85.24569391 | 8.236993468  |
| Streptococcus equi                    | 1336 | 246  | 98.37022988 | 295  | 84.31951217 | 14.05071771  |
| Streptococcus intermedius             | 1338 | 15   | 96.99565887 | 147  | 86.65935091 | 10.33630797  |
| Streptococcus parvuberis              | 1348 | 22   | 99.13282845 | 27   | 82.47485182 | 16.65797663  |
| Streptococcus uberis                  | 1349 | 14   | 98.18179812 | 41   | 81.96681232 | 16.2149858   |
| Enterococcus faecium                  | 1352 | 928  | 99.00803326 | 104  | 88.48320374 | 10.52482952  |
| Enterococcus hirae                    | 1354 | 30   | 99.40498234 | 1004 | 83.42873647 | 15.97624587  |
| Bacillus amyloliquefaciens            | 1390 | 51   | 95.20960909 | 362  | 86.01116503 | 9.198444059  |
| Bacillus anthracis                    | 1392 | 206  | 98.86059689 | 2069 | 91.66350309 | 7.197093794  |
| Bacillus cereus                       | 1396 | 983  | 94.43785532 | 1293 | 92.65312886 | 1.784726458  |
| Bacillus licheniformis                | 1402 | 67   | 99.16314535 | 39   | 91.31814605 | 7.844999309  |
| Bacillus megaterium                   | 1404 | 79   | 97.14970046 | 31   | 95.63240834 | 1.517292121  |
| Bacillus mycoides                     | 1405 | 59   | 95.330369   | 2217 | 90.04264888 | 5.287720114  |
| Paenibacillus polymyxa                | 1406 | 30   | 93.69930115 | 23   | 90.04706175 | 3.652239933  |
| Bacillus pumilus                      | 1408 | 44   | 92.68778894 | 77   | 91.08326013 | 1.604528814  |
| Lysinibacillus sphaericus             | 1421 | 16   | 85.88037395 | 38   | 83.85025627 | 2.030117687  |
| Bacillus subtilis                     | 1423 | 159  | 96.20147019 | 257  | 83.12061663 | 13.08085356  |
| Bacillus thuringiensis                | 1428 | 475  | 96.56841251 | 1801 | 92.3856945  | 4.182718005  |
| Bacillus atrophaeus                   | 1452 | 27   | 98.92330126 | 387  | 81.38551626 | 17.53778499  |
| Bacillus simplex                      | 1478 | 13   | 94.03698455 | 21   | 91.93104735 | 2.105937201  |
| Clostridium botulinum                 | 1491 | 130  | 97.632039   | 28   | 92.95901544 | 4.673023559  |
| Clostridioides difficile              | 1496 | 1170 | 99.14745249 | 13   | 99.12606577 | 0.021386721  |
| Paeniloclostridium sordellii          | 1505 | 43   | 98.20751084 | 13   | 83.64697234 | 14.5605385   |
| Clostridium sporogenes                | 1509 | 23   | 97.28061719 | 136  | 92.61898216 | 4.661635033  |
| Clostridium beijerinckii              | 1520 | 19   | 96.98259494 | 19   | 87.18597412 | 9.796620821  |
| [Clostridium] clostridioforme         | 1531 | 16   | 98.70909678 | 17   | 90.39312721 | 8.315969571  |
| Lactobacillus acidophilus             | 1539 | 20   | 99.9676578  | 142  | 82.60129535 | 17.36636245  |
| Lactobacillus casei                   | 1582 | 46   | 85.01960293 | 194  | 83.62636771 | 1.393235226  |
| Lactobacillus helveticus              | 1587 | 30   | 98.82068581 | 125  | 83.76398308 | 15.05670273  |
| Lactobacillus pentosus                | 1589 | 12   | 98.02048747 | 248  | 83.19766202 | 14.82282545  |
| Lactobacillus plantarum               | 1590 | 238  | 98.11473228 | 25   | 84.7883815  | 13.32635078  |
| Lactobacillus gasseri                 | 1596 | 26   | 97.0664856  | 55   | 86.24749582 | 10.81898977  |
| Lactobacillus paracasei               | 1597 | 64   | 98.75731267 | 176  | 86.19509982 | 12.56221286  |
| Lactobacillus sakei                   | 1599 | 32   | 97.92944939 | 16   | 83.141994   | 14.78745539  |
| Lactobacillus sanfranciscensis        | 1625 | 13   | 99.50175183 | 12   | 79.89737574 | 19.60437608  |
| Listeria monocytogenes                | 1639 | 2293 | 96.96466429 | 22   | 85.44069891 | 11.52396538  |
| Actinomyces naeslundii                | 1655 | 21   | 96.80905551 | 55   | 86.69590357 | 10.113151194 |
| Bifidobacterium adolescentis          | 1680 | 25   | 98.30018573 | 334  | 85.04845242 | 13.25173331  |

|                                    |       |      |             |       |             |             |
|------------------------------------|-------|------|-------------|-------|-------------|-------------|
| Bifidobacterium bifidum            | 1681  | 31   | 99.25597    | 312   | 85.65199874 | 13.60397126 |
| Bifidobacterium breve              | 1685  | 81   | 98.80518726 | 215   | 87.72513402 | 11.08005324 |
| Bifidobacterium pseudolongum       | 1694  | 19   | 95.89980164 | 71    | 84.92800928 | 10.97179235 |
| Corynebacterium pseudotuberculosis | 1719  | 77   | 99.43208418 | 19    | 84.99738492 | 14.43469926 |
| Cutibacterium acnes                | 1747  | 137  | 99.2605673  | 47    | 90.70528663 | 8.55528066  |
| Mycobacterium avium                | 1764  | 186  | 98.82836535 | 6028  | 83.38071616 | 15.44764918 |
| Mycobacterium bovis                | 1765  | 97   | 99.95880591 | 5865  | 98.53982125 | 1.418984665 |
| Mycobacterium fortuitum            | 1766  | 21   | 98.07992026 | 294   | 83.10249431 | 14.97742596 |
| Mycobacterium intracellulare       | 1767  | 14   | 98.69299874 | 6072  | 83.19474916 | 15.49824958 |
| Mycobacterium kansasii             | 1768  | 41   | 97.7989956  | 5885  | 83.17072547 | 14.62827013 |
| Mycobacterium tuberculosis         | 1773  | 5354 | 99.92314808 | 552   | 87.47467662 | 12.44847146 |
| Mycobacterium chelonae             | 1774  | 42   | 95.96206702 | 1595  | 84.72284605 | 11.23922097 |
| Mycobacterium asiaticum            | 1790  | 10   | 93.48028013 | 5759  | 82.15862099 | 11.32165915 |
| Rhodococcus fascians               | 1828  | 29   | 93.06805025 | 73    | 87.96471179 | 5.10333846  |
| Rhodococcus erythropolis           | 1833  | 16   | 97.47887564 | 34    | 94.08362243 | 3.39525321  |
| Streptomyces griseus               | 1911  | 21   | 90.00312271 | 864   | 85.15443032 | 4.848692391 |
| Streptomyces rimosus               | 1927  | 32   | 99.07066714 | 220   | 85.33247435 | 13.73819279 |
| Streptomyces scabiei               | 1930  | 15   | 96.34119924 | 355   | 85.59444881 | 10.74675043 |
| Rothia dentocariosa                | 2047  | 10   | 95.20685654 | 13    | 94.635366   | 0.571490537 |
| Mycoplasma capricolum              | 2095  | 22   | 98.19375687 | 23    | 88.44522924 | 9.748527626 |
| Mycoplasma mycoides                | 2102  | 15   | 96.75717799 | 19    | 87.58463622 | 9.172541769 |
| Ureaplasma urealyticum             | 2130  | 13   | 99.57959337 | 10    | 89.69110641 | 9.88848695  |
| Mesoplasma florum                  | 2151  | 13   | 95.95585574 | 11    | 86.34890123 | 9.606954508 |
| Methanosarcina mazei               | 2209  | 62   | 98.94092635 | 15    | 85.8497846  | 13.09114175 |
| Burkholderia mallei                | 13373 | 63   | 99.89846257 | 1956  | 91.0525571  | 8.845905463 |
| Bifidobacterium animalis           | 28025 | 38   | 97.45584656 | 30    | 84.9927241  | 12.46312246 |
| Bifidobacterium pseudocatenulatum  | 28026 | 15   | 98.54906423 | 199   | 86.09830802 | 12.45075621 |
| Staphylococcus lugdunensis         | 28035 | 21   | 99.47445642 | 320   | 84.12045968 | 15.33596675 |
| Streptococcus mitis                | 28037 | 57   | 94.02051013 | 8319  | 92.18554634 | 1.834963791 |
| Lactobacillus curvatus             | 28038 | 13   | 98.83958588 | 35    | 83.17237745 | 15.66720843 |
| Acinetobacter lwoffii              | 28090 | 12   | 91.8148072  | 157   | 83.79896404 | 8.015843156 |
| Burkholderia gladioli              | 28095 | 19   | 98.71760729 | 1910  | 84.50961932 | 14.20798797 |
| Alteromonas macleodii              | 28108 | 13   | 97.21174622 | 27    | 84.95612731 | 12.25561891 |
| Bacteroides ovatus                 | 28116 | 17   | 98.02607298 | 57    | 88.16044679 | 9.865626187 |
| Prevotella intermedia              | 28131 | 29   | 96.70939627 | 12    | 85.59550678 | 11.11388949 |
| Cronobacter sakazakii              | 28141 | 303  | 97.89455407 | 18143 | 83.18545587 | 14.70909882 |
| Yersinia kristensenii              | 28152 | 18   | 95.34823481 | 681   | 85.45552204 | 9.892712771 |
| Leptospira noguchii                | 28182 | 14   | 96.54222815 | 426   | 87.99518161 | 8.547046546 |
| Leptospira santarosai              | 28183 | 39   | 98.39702352 | 402   | 83.66442423 | 14.73259929 |
| Leptospira weilii                  | 28184 | 17   | 95.20398398 | 424   | 84.39074617 | 10.81323781 |
| Arcobacter butzleri                | 28197 | 12   | 97.90538268 | 45    | 81.34765479 | 16.55772788 |
| Clavibacter michiganensis          | 28447 | 23   | 95.85612228 | 86    | 83.29644294 | 12.55967934 |
| Burkholderia pseudomallei          | 28450 | 727  | 99.36602361 | 1296  | 86.7282427  | 12.63778092 |
| Salmonella enterica                | 28901 | 7644 | 98.84603469 | 17165 | 83.13297158 | 15.7130631  |
| Staphylococcus saprophyticus       | 29385 | 44   | 98.09854312 | 84    | 83.41595005 | 14.68259307 |
| Staphylococcus capitis             | 29388 | 40   | 97.02051353 | 9637  | 82.59640776 | 14.42410577 |
| Acinetobacter haemolyticus         | 29430 | 10   | 96.94959335 | 2879  | 82.45229364 | 14.49729971 |
| Pseudomonas savastanoi             | 29438 | 29   | 98.8424718  | 1131  | 86.38091047 | 12.46156133 |
| Xanthomonas albilineans            | 29447 | 15   | 98.56393382 | 550   | 82.83749485 | 15.72643896 |
| Bradyrhizobium elkanii             | 29448 | 11   | 94.17519795 | 173   | 84.81568706 | 9.35951089  |
| Brucella melitensis                | 29459 | 167  | 99.89762764 | 381   | 97.56269647 | 2.334931163 |
| Brucella suis                      | 29461 | 53   | 99.85767992 | 495   | 98.05147582 | 1.806204106 |
| Yersinia frederiksenii             | 29484 | 29   | 89.99037606 | 671   | 84.8187365  | 5.171639562 |
| Yersinia ruckeri                   | 29486 | 63   | 99.78926966 | 640   | 82.77049347 | 17.01877619 |
| Vibrio splendidus                  | 29497 | 68   | 94.92009849 | 276   | 89.11416926 | 5.805929228 |
| Leptospira kirschneri              | 29507 | 28   | 99.08854757 | 412   | 89.01175432 | 10.07679325 |
| Borrelia garinii                   | 29519 | 22   | 98.44455407 | 120   | 91.17442042 | 7.270133648 |
| Mycoplasma ovipneumoniae           | 29562 | 12   | 93.8334791  | 11    | 84.50378695 | 9.329692147 |
| Caldicellulosiruptor bescii        | 31899 | 21   | 99.97613743 | 12    | 88.90246646 | 11.07367098 |
| Cutibacterium avidum               | 33010 | 13   | 98.29661619 | 174   | 83.30083878 | 14.99577741 |
| Yersinia mollaretii                | 33060 | 10   | 96.91955414 | 689   | 84.82362905 | 12.09592509 |
| Pseudomonas viridiflava            | 33069 | 12   | 96.39781628 | 1100  | 83.88958798 | 12.5082283  |
| Rathayibacter rathayi              | 33887 | 23   | 99.61853624 | 69    | 89.22202821 | 10.39650804 |
| Mycobacterium africanum            | 33894 | 29   | 99.95845584 | 5876  | 98.72430346 | 1.234152386 |
| Anoxybacillus flavithermus         | 33934 | 10   | 90.36416796 | 16    | 88.62440991 | 1.739758041 |
| Lactobacillus johnsonii            | 33959 | 25   | 97.37568315 | 55    | 86.73618816 | 10.63949499 |
| Leuconostoc citreum                | 33964 | 10   | 97.53132706 | 22    | 82.06307845 | 15.46824861 |
| Leuconostoc pseudomesenteroides    | 33968 | 22   | 99.7083546  | 56    | 85.80249269 | 13.90586192 |
| Variovorax paradoxus               | 34073 | 14   | 89.73790359 | 160   | 83.34007931 | 6.397824287 |
| Rickettsia japonica                | 35790 | 33   | 99.98925519 | 89    | 93.76259356 | 6.226661631 |
| Bordetella holmesii                | 35814 | 28   | 99.96448244 | 744   | 84.5208162  | 15.44366625 |
| Mycobacterium abscessus            | 36809 | 1541 | 97.8173747  | 96    | 85.24539635 | 12.57197835 |
| Brucella canis                     | 36855 | 21   | 99.98717556 | 527   | 98.14031584 | 1.846859717 |
| Enterococcus casseliflavus         | 37734 | 15   | 97.79602078 | 26    | 89.85343669 | 7.94258409  |
| Bartonella henselae                | 38323 | 24   | 99.42714824 | 86    | 83.9261735  | 15.50097474 |
| Acinetobacter johnsonii            | 40214 | 11   | 97.21628609 | 441   | 82.87727809 | 14.3390008  |
| Acinetobacter junii                | 40215 | 14   | 97.15091852 | 2902  | 82.17012345 | 14.98079507 |
| Acinetobacter radioresistens       | 40216 | 12   | 98.91183427 | 151   | 83.78520544 | 15.12662883 |
| Stenotrophomonas maltophilia       | 40324 | 251  | 92.70539295 | 831   | 82.92840208 | 9.776990867 |

|                                 |        |     |             |       |             |              |
|---------------------------------|--------|-----|-------------|-------|-------------|--------------|
| Rothia mucilaginosa             | 43675  | 19  | 93.83286968 | 28    | 93.98228591 | -0.149416228 |
| Rhodococcus hoagii              | 43767  | 35  | 99.17683809 | 59    | 82.85418603 | 16.32265206  |
| Corynebacterium striatum        | 43770  | 16  | 98.45733309 | 62    | 85.62389681 | 12.83343627  |
| Streptococcus cristatus         | 45634  | 15  | 93.2587204  | 8379  | 86.33135653 | 6.927363863  |
| Pseudomonas avellanae           | 46257  | 11  | 98.83429298 | 631   | 89.19376033 | 9.640532654  |
| Lactobacillus rhamnosus         | 47715  | 113 | 98.35755086 | 128   | 84.25177953 | 14.10577134  |
| Lactobacillus crispatus         | 47770  | 56  | 97.90522909 | 97    | 83.65456527 | 14.25066382  |
| Pseudomonas amygdali            | 47877  | 55  | 97.26274349 | 1306  | 86.15004143 | 11.11270206  |
| Serratia fonticola              | 47917  | 10  | 96.24532106 | 441   | 83.93325188 | 12.31206918  |
| Vibrio cyclitrophicus           | 47951  | 73  | 99.1087426  | 237   | 88.32990078 | 10.77884181  |
| Acinetobacter pittii            | 48296  | 156 | 97.15955227 | 2755  | 88.20466065 | 8.95489162   |
| Enterococcus mundtii            | 53346  | 15  | 96.68826803 | 1000  | 82.54315054 | 14.14511748  |
| Lactobacillus lindneri          | 53444  | 12  | 99.92788095 | 14    | 80.45386087 | 19.47402008  |
| Raoultella ornithinolytica      | 54291  | 36  | 99.01520093 | 14908 | 83.29038296 | 15.72481797  |
| Salmonella bongori              | 54736  | 11  | 98.4231935  | 19217 | 85.68552539 | 12.73766811  |
| Vibrio anguillarum              | 55601  | 16  | 98.58077478 | 736   | 81.91446462 | 16.66631017  |
| Xanthomonas arboricola          | 56448  | 52  | 96.46306713 | 1007  | 85.99468846 | 10.46837866  |
| Xanthomonas vasicola            | 56459  | 16  | 98.94629192 | 860   | 88.07171788 | 10.87457404  |
| Citrobacter braakii             | 57706  | 19  | 98.67055833 | 22873 | 83.27876513 | 15.3917932   |
| Burkholderia thailandensis      | 57975  | 39  | 98.92385874 | 1978  | 88.64795011 | 10.27590863  |
| Burkholderia vietnamiensis      | 60552  | 40  | 98.89301796 | 1986  | 87.26077964 | 11.63223832  |
| Enterobacter asburiae           | 61645  | 50  | 96.12178864 | 11266 | 83.85981849 | 12.26197015  |
| Pluralibacter gergoviae         | 61647  | 16  | 98.93204212 | 15548 | 82.43906845 | 16.49297367  |
| Bacillus pseudomycoloides       | 64104  | 103 | 97.67731942 | 2170  | 85.5314038  | 12.14591562  |
| Corynebacterium ulcerans        | 65058  | 19  | 97.86144257 | 77    | 84.93828835 | 12.92315421  |
| Pantoea stewartii               | 66269  | 10  | 99.12049789 | 145   | 82.60683857 | 16.51365933  |
| Pseudomonas plecoglossicida     | 70775  | 13  | 91.09330018 | 3289  | 82.81056479 | 8.282735389  |
| Campylobacter lanienae          | 75658  | 25  | 97.58588715 | 51    | 87.03684474 | 10.54904241  |
| Pseudomonas montellii           | 76759  | 12  | 92.06253815 | 3169  | 82.95956204 | 9.102976104  |
| Serratia plymuthica             | 82996  | 11  | 97.55921797 | 451   | 85.62271932 | 11.93649865  |
| Mycobacterium immunogenum       | 83262  | 17  | 99.79193592 | 1620  | 86.7913927  | 13.00054322  |
| Chlamydia psittaci              | 83554  | 60  | 98.57373377 | 58    | 91.24589552 | 7.327838249  |
| Chlamydia muridarum             | 83560  | 26  | 99.94468033 | 177   | 81.57440455 | 18.37027578  |
| Achromobacter xylosoxidans      | 85698  | 35  | 95.58089481 | 828   | 85.28256046 | 10.29833434  |
| Pseudomonas lundensis           | 86185  | 20  | 97.96861458 | 406   | 83.27646443 | 14.69215014  |
| Burkholderia multivorans        | 87883  | 86  | 97.85677513 | 1951  | 87.25636114 | 10.60041399  |
| Xanthomonas gardneri            | 90270  | 12  | 99.79757182 | 1020  | 86.00557942 | 13.7919924   |
| Burkholderia cenocepacia        | 95486  | 255 | 98.74198204 | 1775  | 87.44650704 | 11.295475    |
| Bordetella hinzii               | 103855 | 10  | 99.63923798 | 883   | 83.87717176 | 15.76206622  |
| Acinetobacter nosocomialis      | 106654 | 39  | 97.87501727 | 2849  | 91.04430275 | 6.830714519  |
| Acinetobacter ursingii          | 108980 | 10  | 98.18374337 | 2916  | 81.40498022 | 16.77876315  |
| Porphyromonas gulae             | 111105 | 11  | 98.29877472 | 61    | 92.64533359 | 5.65344132   |
| Lactobacillus parabuchneri      | 152331 | 23  | 98.89362335 | 15    | 81.70784454 | 17.18577881  |
| Burkholderia ambifaria          | 152480 | 10  | 96.40345001 | 2016  | 87.54503664 | 8.858413376  |
| Bacillus toyonensis             | 155322 | 200 | 99.14165817 | 2075  | 91.18544421 | 7.956213962  |
| Enterobacter hormaechei         | 158836 | 354 | 96.25438302 | 24933 | 83.03709788 | 13.21728514  |
| Elizabethkingia miricola        | 172045 | 13  | 96.58816294 | 96    | 90.29884291 | 6.289320029  |
| Enterovibrio norvegicus         | 188144 | 10  | 92.57033234 | 13    | 85.40616842 | 7.164163912  |
| Paenibacillus odorifer          | 189426 | 31  | 97.03072283 | 24    | 83.23614724 | 13.79457559  |
| Vibrio coralliilyticus          | 190893 | 13  | 97.05618873 | 300   | 82.95961095 | 14.09657778  |
| Dickeya zeae                    | 204042 | 10  | 96.36544876 | 87    | 83.72069786 | 12.6447509   |
| Enterobacter kobei              | 208224 | 29  | 88.00185022 | 19789 | 82.68026521 | 5.321585005  |
| Escherichia albertii            | 208962 | 48  | 98.82006613 | 19175 | 87.47205149 | 11.34801465  |
| Vibrio tasmaniensis             | 212663 | 11  | 94.43620925 | 307   | 89.30882676 | 5.127382488  |
| Bifidobacterium longum          | 216816 | 11  | 97.25482186 | 218   | 87.14281836 | 10.1120035   |
| Phaeobacter inhibens            | 221822 | 21  | 97.68718792 | 41    | 85.91968108 | 11.76750684  |
| Mycobacterium chimaera          | 222805 | 19  | 99.46958457 | 5908  | 83.00251552 | 16.46706905  |
| Pseudomonas psychrotolerans     | 237610 | 16  | 90.77412748 | 2626  | 82.74163635 | 8.032491136  |
| Klebsiella varicola             | 244366 | 66  | 99.05228875 | 15455 | 85.69264321 | 13.35964554  |
| Vibrio crassostreae             | 246167 | 14  | 95.63223158 | 334   | 88.34193854 | 7.290293032  |
| Streptococcus pseudopneumoniae  | 257758 | 36  | 93.14407174 | 8323  | 94.65339374 | -1.509322001 |
| Bacillus halotolerans           | 260554 | 15  | 98.49594116 | 401   | 84.11207344 | 14.38386773  |
| Staphylococcus pseudintermedius | 283734 | 88  | 99.39119608 | 35    | 89.28104401 | 10.11015207  |
| Bacillus altitudinis            | 293387 | 11  | 98.29882164 | 110   | 92.09970935 | 6.199112285  |
| Enterobacter ludwigii           | 299767 | 12  | 98.0426608  | 16711 | 82.90557647 | 15.13708433  |
| Alteromonas mediterranea        | 314275 | 11  | 98.10163741 | 28    | 84.04326657 | 14.05837084  |
| Streptococcus gallolyticus      | 315405 | 19  | 98.18162737 | 50    | 88.01926147 | 10.1623659   |
| Mycobacterium colombiense       | 339268 | 18  | 93.68381141 | 6116  | 82.89935817 | 10.78445324  |
| Salinispora pacifica            | 351187 | 37  | 94.57629601 | 123   | 86.12226477 | 8.454031238  |
| Xanthomonas fuscans             | 366648 | 29  | 99.65428761 | 988   | 88.73473498 | 10.91955263  |
| Fischerella thermalis           | 372787 | 29  | 99.11745216 | 13    | 90.84017534 | 8.277276826  |
| Pseudomonas protegens           | 380021 | 18  | 97.96502304 | 3877  | 82.73607414 | 15.22894891  |
| Bacillus aryabhatai             | 412384 | 17  | 96.03637351 | 99    | 95.11844591 | 0.917927597  |
| Cronobacter dublinensis         | 413497 | 30  | 98.03331967 | 10545 | 83.59336895 | 14.43995072  |
| Cronobacter malonaticus         | 413503 | 40  | 98.96979396 | 647   | 88.99396632 | 9.975827636  |
| Xanthomonas perforans           | 442694 | 33  | 99.90954104 | 1013  | 88.21741211 | 11.69212893  |
| Mycobacterium conceptionense    | 451644 | 11  | 98.97508857 | 346   | 83.32269203 | 15.65239654  |
| Xanthomonas euvesicatoria       | 456327 | 37  | 99.79539222 | 1007  | 88.236548   | 11.55884422  |
| Burkholderia contaminans        | 488447 | 10  | 98.17966588 | 2006  | 87.74488343 | 10.43478245  |

|                             |         |     |             |       |             |             |
|-----------------------------|---------|-----|-------------|-------|-------------|-------------|
| Bacillus velezensis         | 492670  | 106 | 98.33685479 | 308   | 85.27599981 | 13.06085498 |
| Lactobacillus taiwanensis   | 508451  | 25  | 98.94200378 | 55    | 86.88863331 | 12.05337047 |
| Bacillus safensis           | 561879  | 19  | 97.57023982 | 101   | 91.22619319 | 6.344046628 |
| Bacillus cytotoxicus        | 580165  | 13  | 99.62997202 | 2261  | 84.289633   | 15.34033902 |
| Pseudomonas chlororaphis    | 587753  | 28  | 95.03477878 | 4321  | 82.86837278 | 12.166406   |
| Vibrio owensii              | 696485  | 13  | 96.86378193 | 1325  | 83.75501724 | 13.10876469 |
| Acinetobacter indicus       | 756892  | 30  | 97.42424077 | 175   | 82.91518643 | 14.50905434 |
| Vibrio jasicida             | 766224  | 16  | 98.08083153 | 1200  | 83.4333204  | 14.64751113 |
| Staphylococcus argenteus    | 985002  | 111 | 99.01716249 | 9346  | 87.977647   | 11.0395155  |
| Staphylococcus agnetis      | 985762  | 10  | 97.38688736 | 12    | 82.52060827 | 14.86627909 |
| Dickeya solani              | 1089444 | 18  | 99.05554132 | 411   | 83.03753025 | 16.01801106 |
| Elizabethkingia anophelis   | 1117645 | 60  | 98.23889066 | 50    | 87.93544308 | 10.30344759 |
| Klebsiella michiganensis    | 1134687 | 63  | 97.27808634 | 4273  | 84.98728944 | 12.2907969  |
| Gilliamella apicola         | 1196095 | 68  | 88.53862    | 24    | 83.12045097 | 5.418169022 |
| Enterobacter xiangfangensis | 1296536 | 27  | 98.47499198 | 23711 | 83.1585587  | 15.31643327 |
| Klebsiella quasipneumoniae  | 1463165 | 137 | 97.93810154 | 13112 | 86.23997177 | 11.69812977 |
| Vibrio metoecus             | 1481663 | 18  | 97.3682891  | 760   | 87.27402744 | 10.09426166 |
| Bacillus paralicheniformis  | 1648923 | 14  | 98.80758013 | 91    | 93.55074671 | 5.256833422 |
| Bacillus wiedmannii         | 1890302 | 135 | 96.68626907 | 2140  | 91.68330614 | 5.002962932 |
| Xanthomonas phaseoli        | 1985254 | 93  | 98.04736471 | 954   | 87.50532241 | 10.5420423  |
